# Supplementary material for: IL-7 and SCF Levels Inversely Correlate with T Cell Reconstitution and Clinical Outcomes after Cord Blood Transplantation in Adults
Source: PubMed Central journal article supplement (PMC4503696; doi:10.1371/journal.pone.0132564), 2015-07-15
Supplement: pone.0132564.s001.pdf [file pone.0132564.s001.pdf]

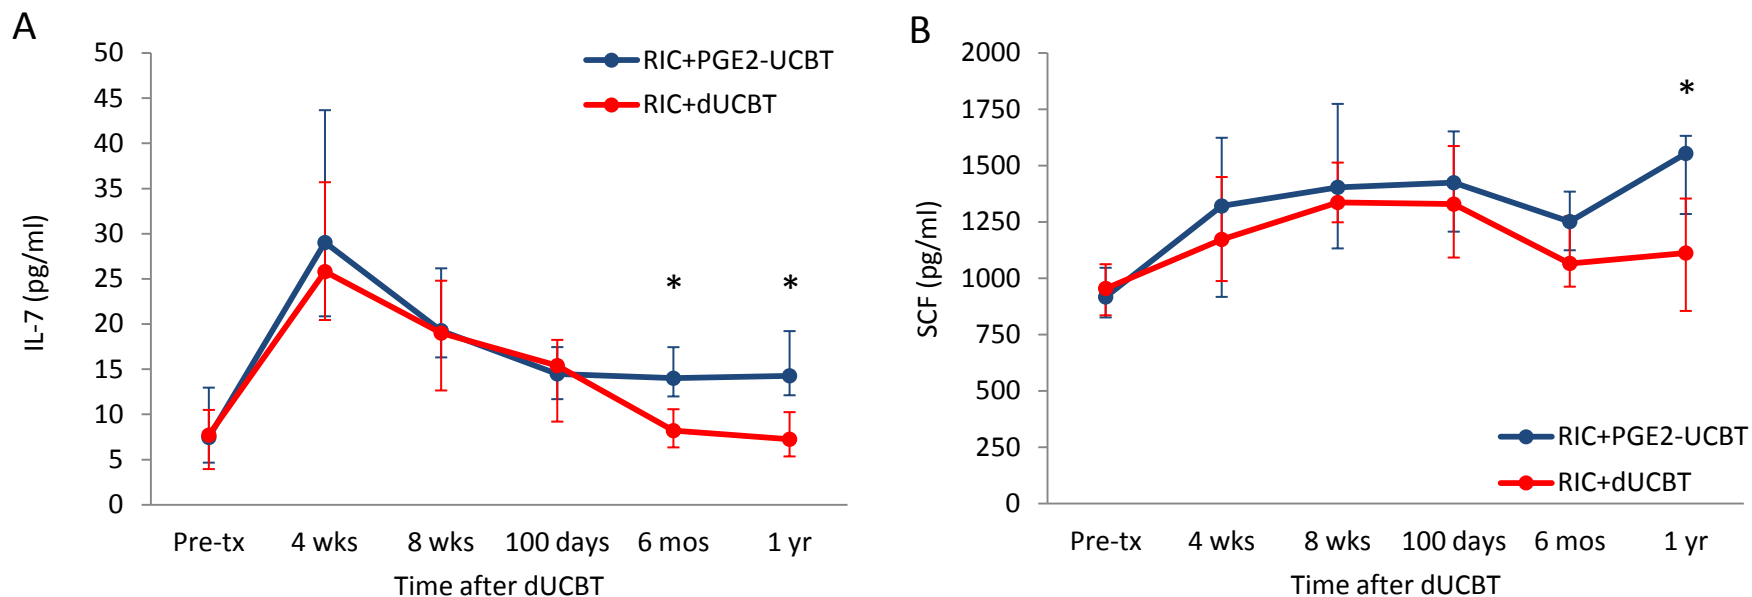

**Figure S1. Kinetics of plasma IL-7 and SCF levels after dUCBT in RIC recipients.** (A) Median IL-7 levels of patients who received RIC regimen followed by one dmPGE2 treated and one unmanipulated UCB graft (RIC+PGE2-UCBT) vs. median IL-7 levels of patients who received two unmanipulated UCB grafts (RIC+dUCBT) through 12 months post-transplantation. (B) Median SCF levels of RIC+PGE2-UCBT vs. RIC+dUCBT recipients through 12 months post-transplantation. Error bars denote 25<sup>th</sup> and 75<sup>th</sup> percentiles. (\* p<0.05)
