# Supplementary material for: IL-7 and SCF Levels Inversely Correlate with T Cell Reconstitution and Clinical Outcomes after Cord Blood Transplantation in Adults
Source: PubMed Central journal article supplement (PMC4503696; doi:10.1371/journal.pone.0132564), 2015-07-15
Supplement: pone.0132564.s002.pdf [file pone.0132564.s002.pdf]

**Supplementary table 1. Correlation of IL-7 and SCF plasma levels during the first year after dUCBT**

| <b>Correlation of IL-7 and SCF levels after dUCBT</b>     |         |         |
|-----------------------------------------------------------|---------|---------|
| Pre-transplant                                            | r       | 0.05    |
|                                                           | p-value | 0.70    |
| 4 weeks                                                   | r       | 0.54    |
|                                                           | p-value | <0.0001 |
| 8 weeks                                                   | r       | 0.34    |
|                                                           | p-value | 0.02    |
| 100 days                                                  | r       | 0.32    |
|                                                           | p-value | 0.02    |
| 6 months                                                  | r       | 0.37    |
|                                                           | p-value | 0.02    |
| 1 year                                                    | r       | 0.52    |
|                                                           | p-value | 0.002   |
| r denotes correlation coefficient from Spearman rank test |         |         |

Levels of IL-7 and SCF were assessed in patients' plasma at the indicated time points after dUCBT and correlation was analyzed.
